# Supplementary material for: Dasatinib Resensitizes MAPK Inhibitor Efficacy in Standard-of-Care Relapsed Melanomas
Source: PubMed Central journal article supplement — bioRxiv. 2023 Jan 21:2023.01.20.524923. Preprint. [Version 1] doi: 10.1101/2023.01.20.524923 (PMC9882271; doi:10.1101/2023.01.20.524923), 2023-01-21

**Supplemental Figure 1:** Dasatinib does not enhance BRAFi/MEKi efficacy in therapy naïve setting. **(A)** The therapy naïve PDX model WM4237-1 was implanted s.q. into an NSG mouse. Treatment with vehicle control, dasatinib, BRAFi//MEKi, or dasatinib + BRAFi/MEKi began when tumors were palpable (denoted with black arrow).

# Supplemental Figure

## A

### WM4237-1

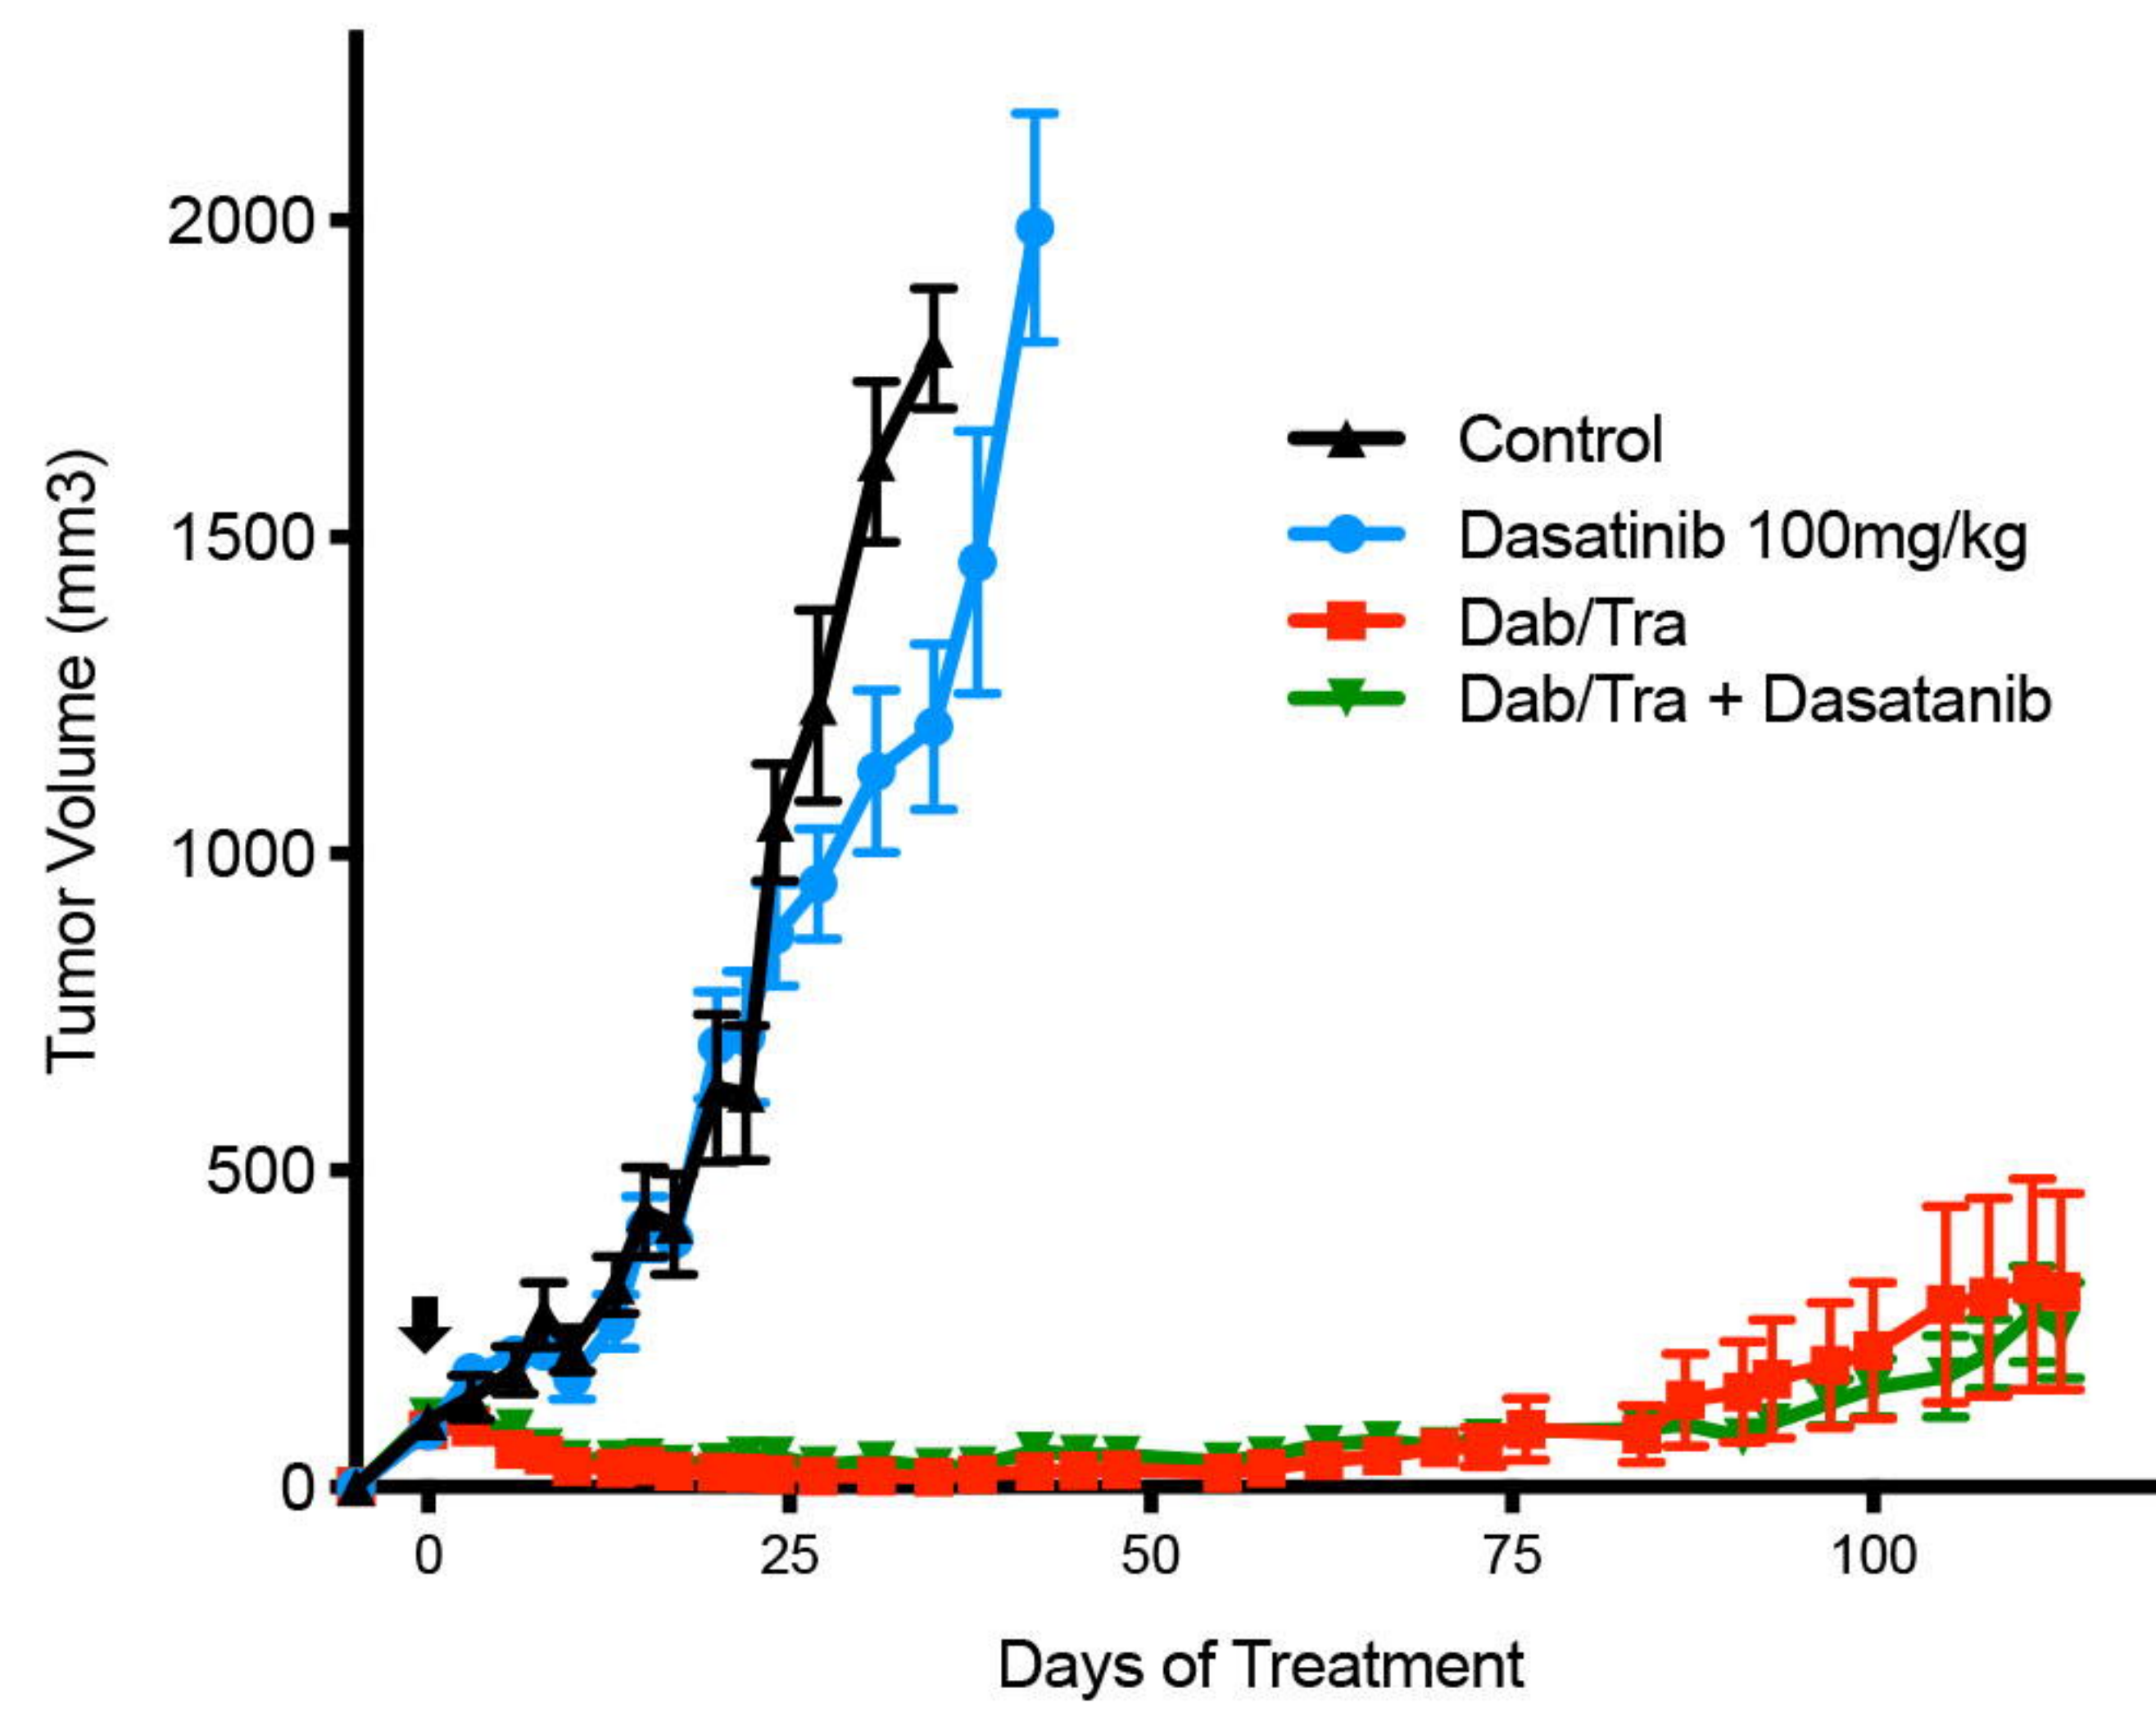

Supplement: NIHPP2023.01.20.524923v1-supplement-1.pdf [file NIHPP2023.01.20.524923v1-supplement-1.pdf]
